# Supplementary material
Source: publisher figshare collection journal article supplement (https://tandf.figshare.com/ndownloader/files/20261949)
Supplement: Supplementary file 1 [file 20261949]

Supplementary Table 1. Types of microplastics derived from popular plastic products used in daily life.

| **Microplastic types** | **Source** | **Formation** | **Polymer** |
| --- | --- | --- | --- |
| Microplastic fibres | Clothes | Washing | Polyester, nylon, acrylic and polyamide |
| Microplastic fibres | Fish farm nets and ropes | Aquaculture activities | Nylon, urylon |
| Microplastic fibres | Textiles | Atmospheric fallout | Polyester, nylon, acrylic and polyamide |
| Microbeads | Cosmetic products | Human cosmetics | Polytetrafluoroethylene |
| Microbeads | Insulation board | Environmental action | Polyurethane |
| Fragments | Plastic packaging | Environmental action | Polyethylene |
| Fragments | Bottles and food containers | Environmental action | Polypropylene |
| Fragments | Containers and Styrofoam | Environmental action | Polystyrene |
| Fragments | Bottles and roofing | Environmental action | Polycarbonate |
| Fragments | Films, pipes and cables | Environmental action | Polyvinylchloride |
| Microplastic fibres /Fragments | Water bottles and fabric | Environmental action | Polyethylene terephthalate |
| Microplastic fibres/ Microbeads /fragments | Tyres | Wear and tear | Styrene butadiene rubber |

Notes: Environmental action (oxidative degradation; photocatalytic action of UV; mechanical action of wind, waves and water currents).
